# Supplementary material
Source: ML conference proceedings conference paper supplement (https://openreview.net/forum?id=bFnWKXCBFN)

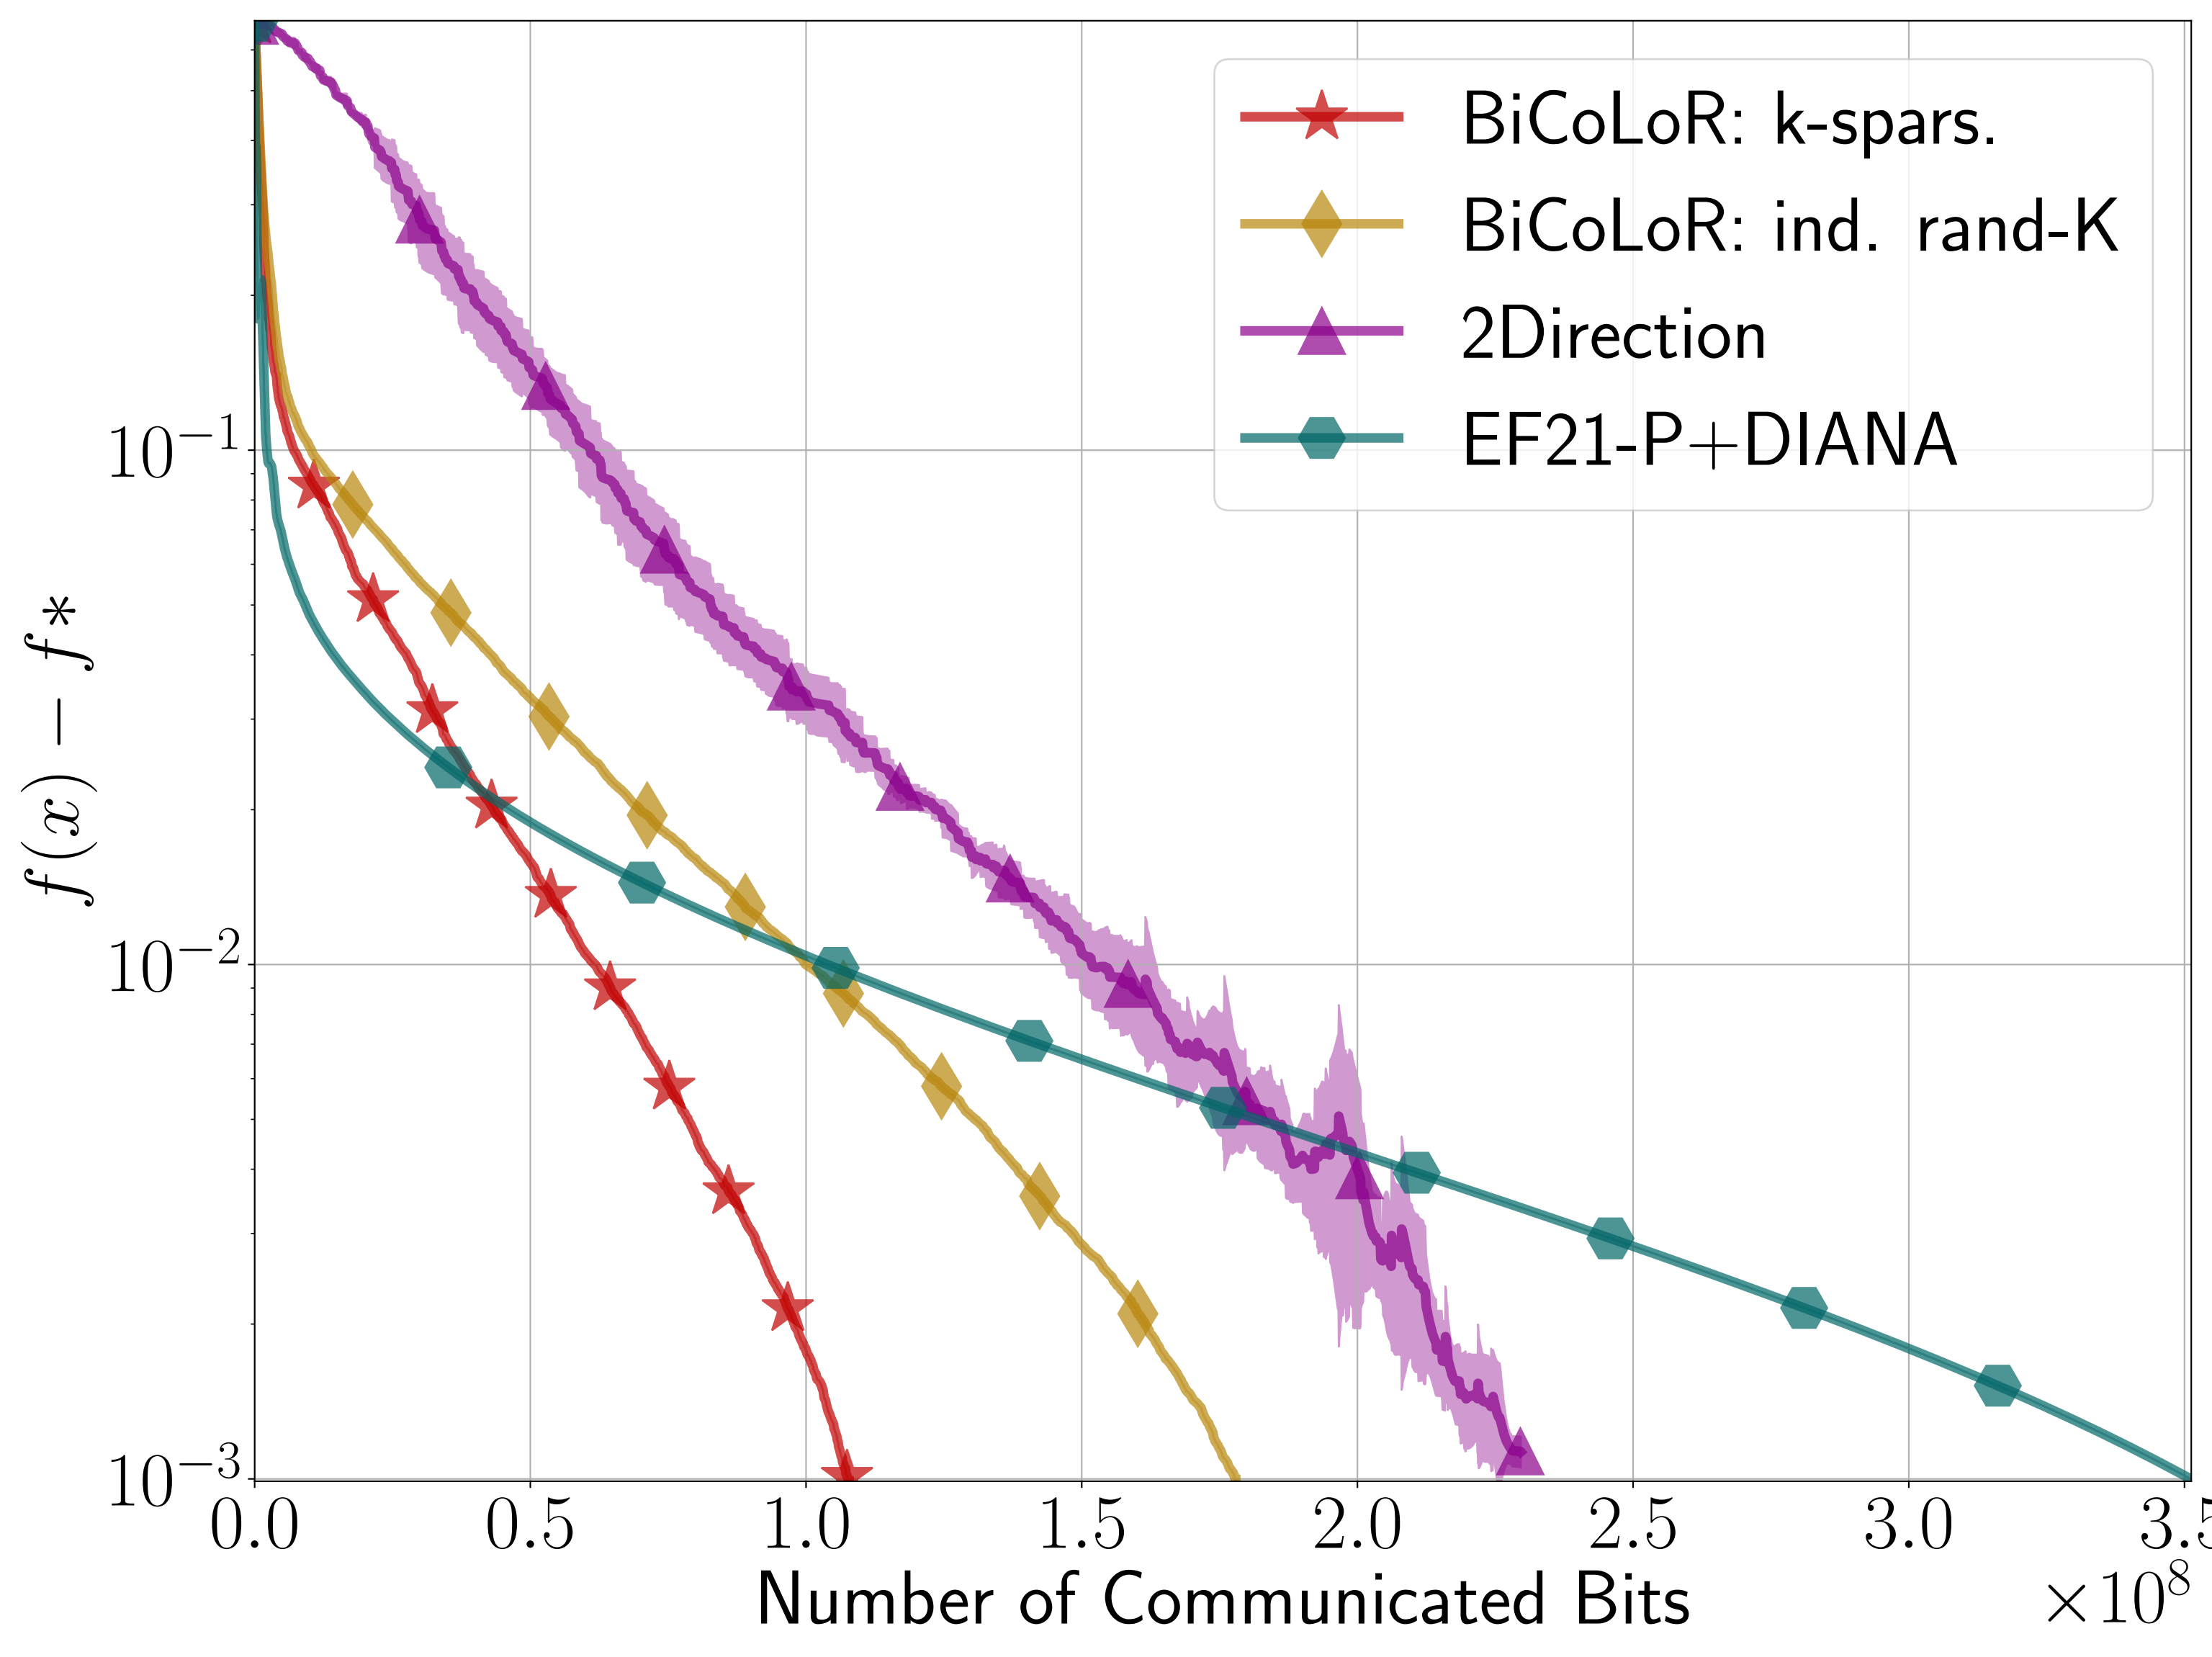

Supplement: supplementary_material [file total_com_BiCoLoR: k-spars..pdf › code/real-sim_n100_alpha1_c1_reg1e-06_r1/total_com_BiCoLoR: k-spars..pdf]

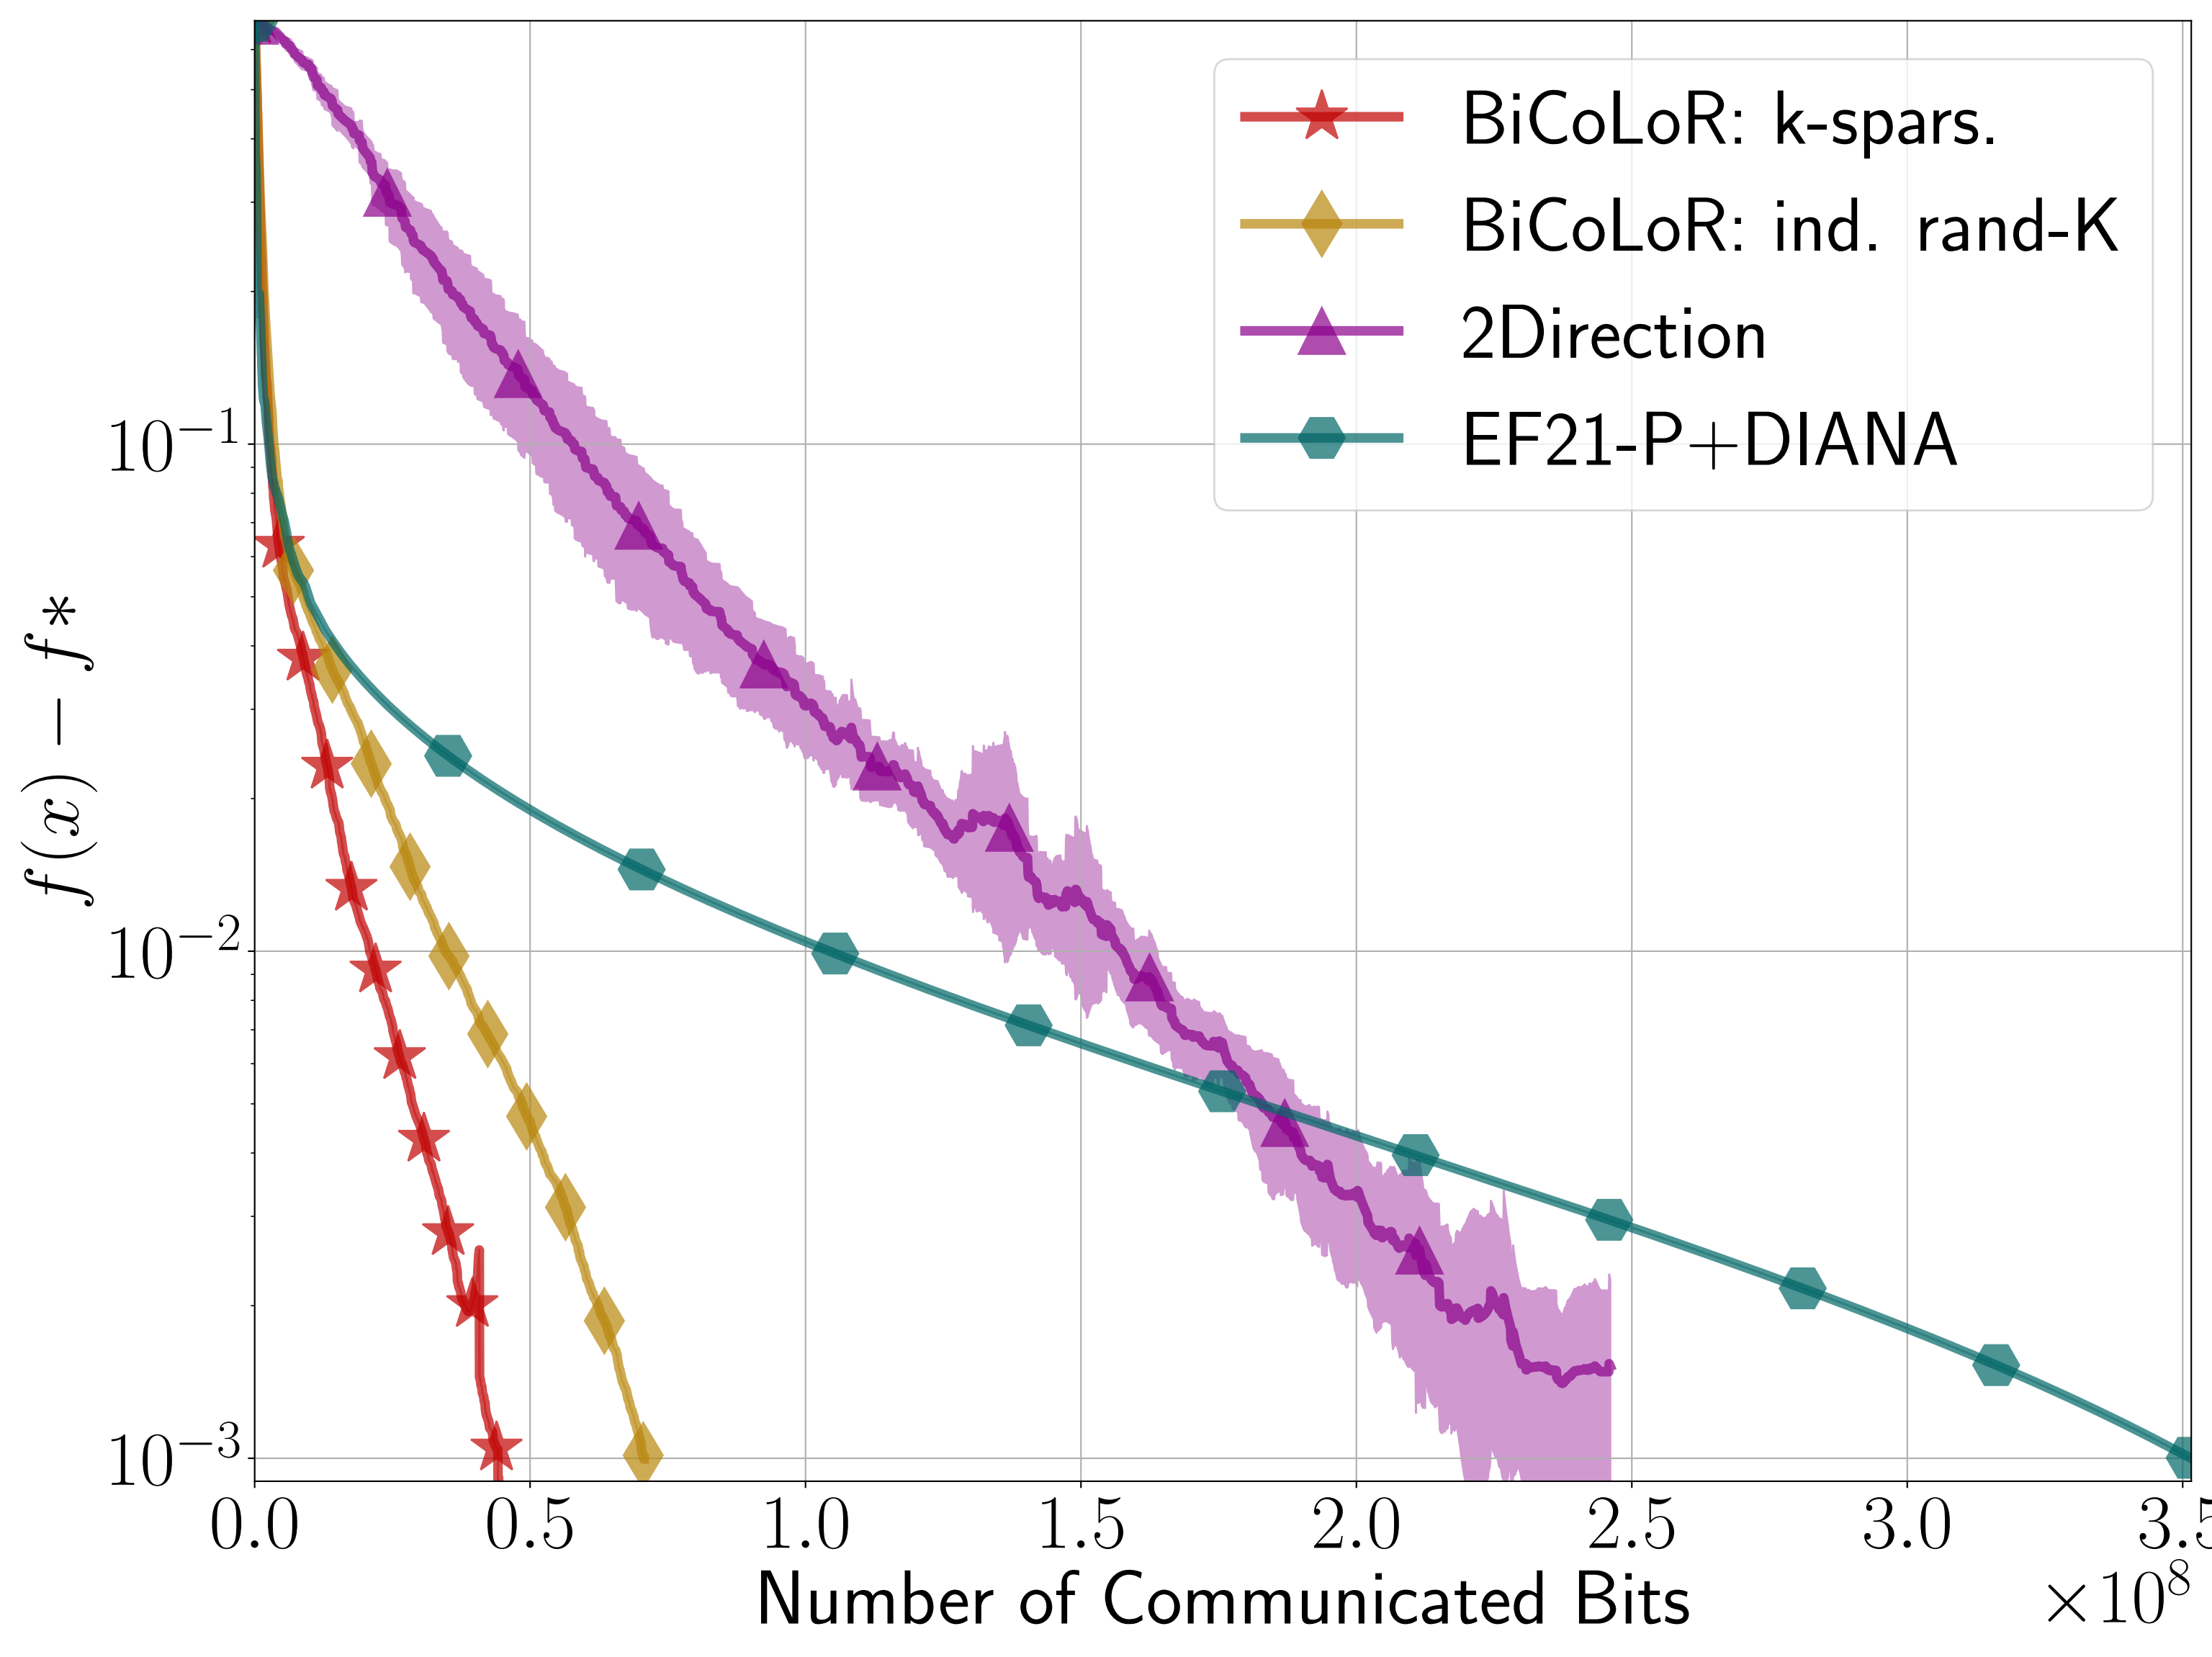

Supplement: supplementary_material [file total_com_BiCoLoR: k-spars..pdf › code/real-sim_n10_alpha1_c1_reg1e-06_r1/total_com_BiCoLoR: k-spars..pdf]

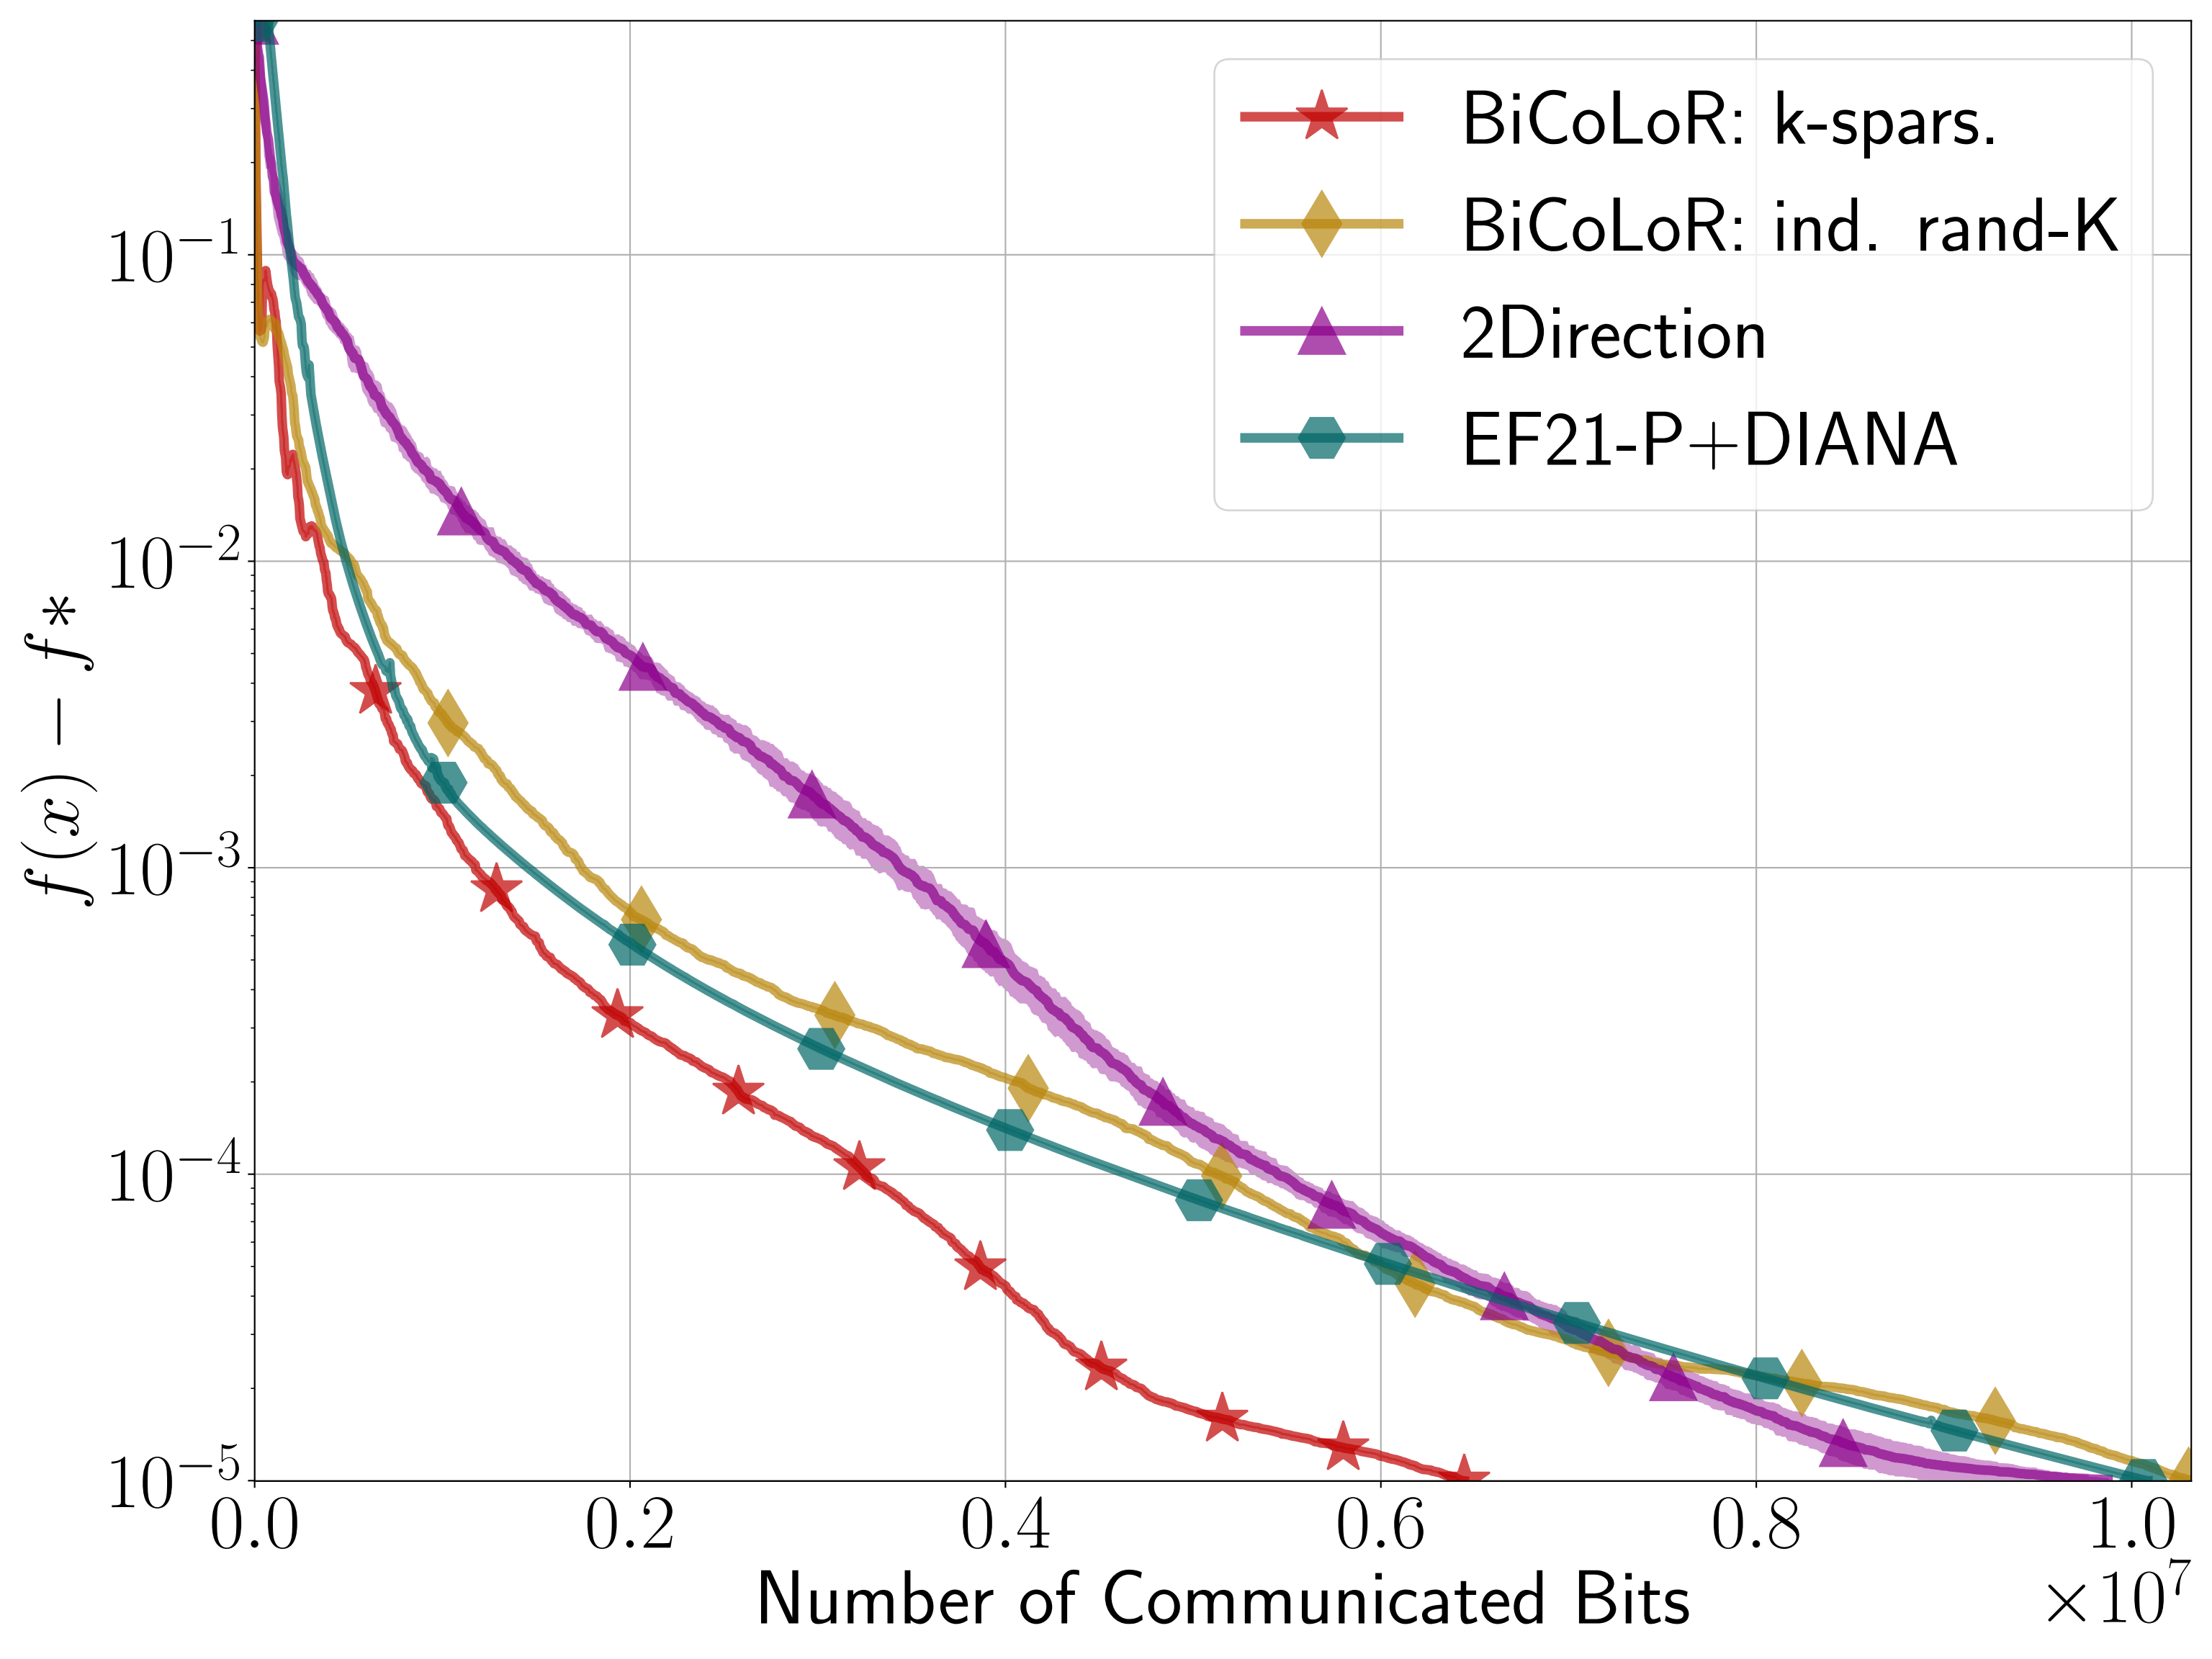

Supplement: supplementary_material [file total_com_BiCoLoR: k-spars..pdf › code/w8a_n100_alpha1_c1_reg1e-06_r1/total_com_BiCoLoR: k-spars..pdf]

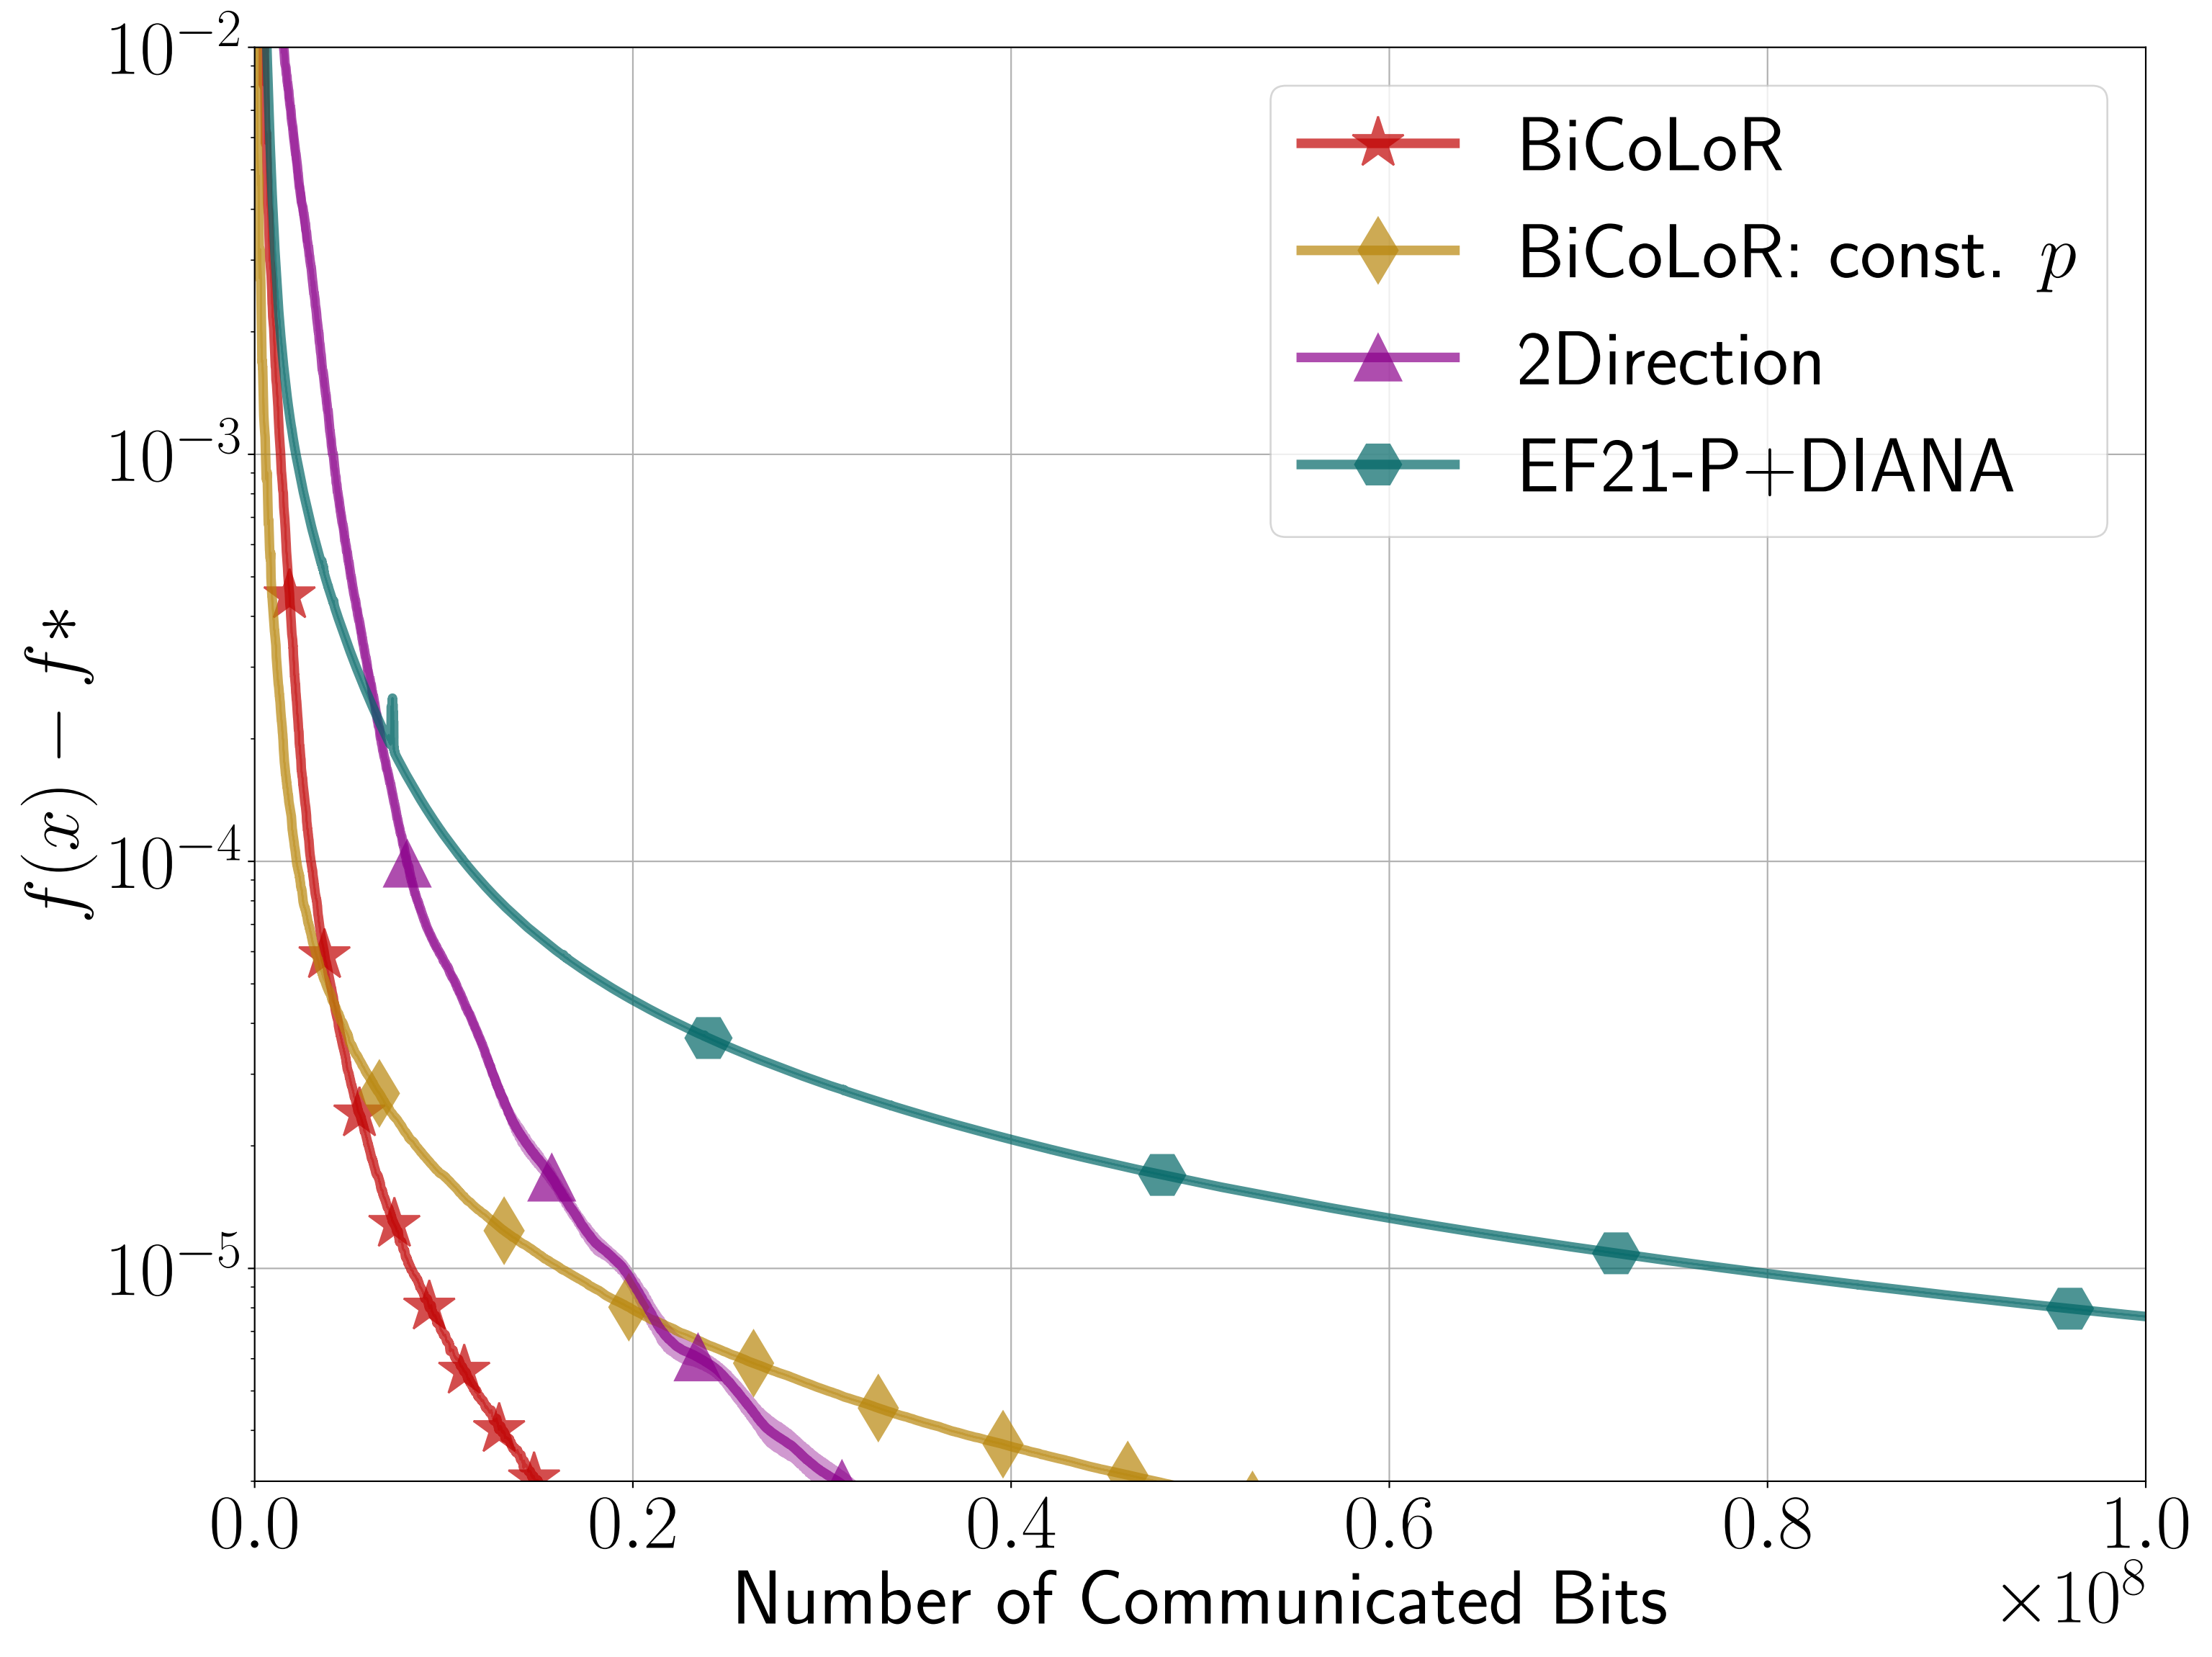

Supplement: supplementary_material [file total_com_BiCoLoR.pdf › code/w8a_n10_alpha1_c1_reg0_r1/total_com_BiCoLoR.pdf]

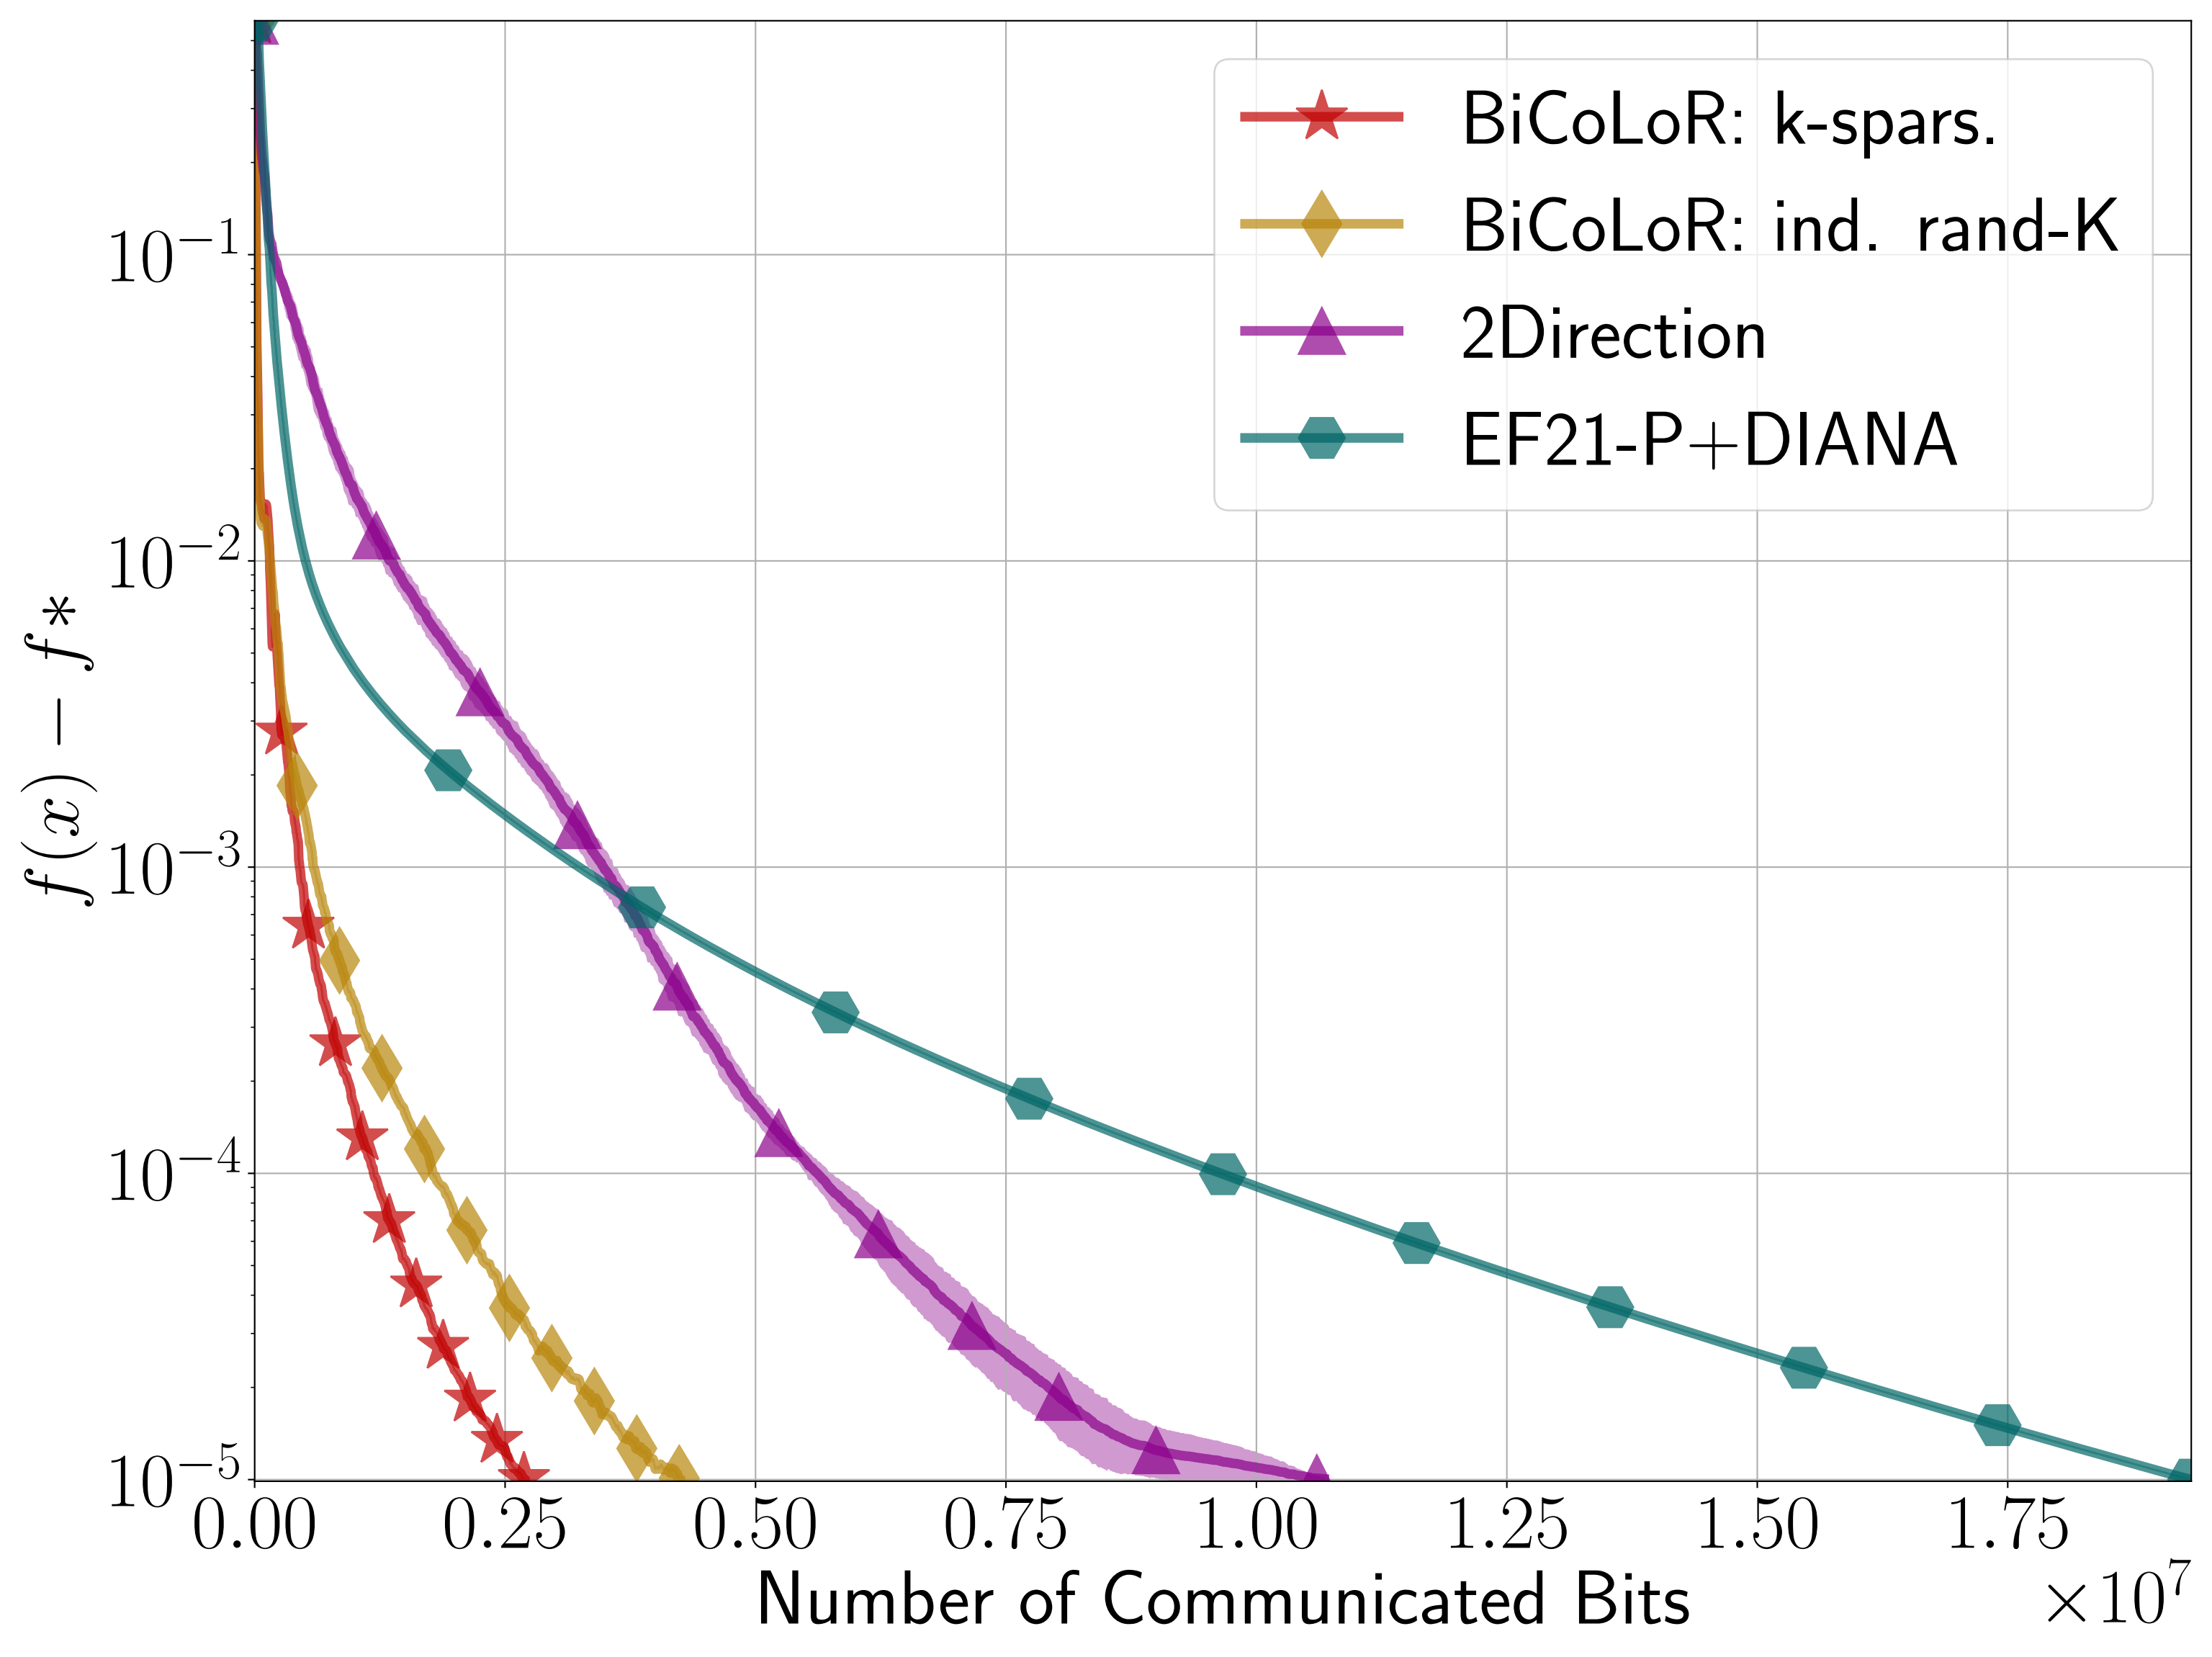

Supplement: supplementary_material [file total_com_BiCoLoR: k-spars..pdf › code/w8a_n10_alpha1_c1_reg1e-06_r1/total_com_BiCoLoR: k-spars..pdf]
